# Supplementary material
Source: PubMed Central journal article supplement (PMC3822377)
Supplement: Supp_Figure4.pdf [file Supp_Figure4.pdf]

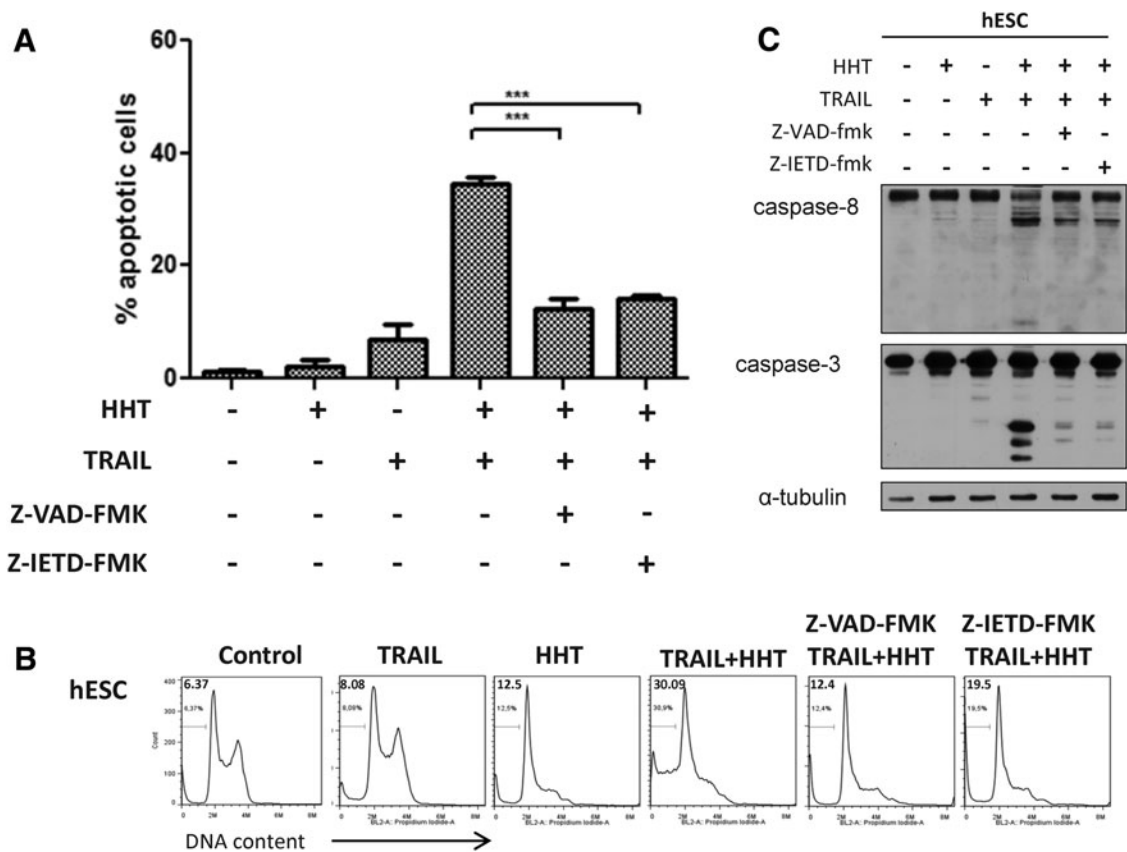

**SUPPLEMENTARY FIG. S4.** Caspase inhibitors suppress HHT + TRAIL-induced apoptosis in hESC. The hESC were left untreated (control), treated with 50 nM HHT or 200 ng/mL human recombinant TRAIL, pretreated with 50 nM HHT for 1 h followed by 200 ng/mL human recombinant TRAIL treatment (HHT + TRAIL), or pretreated with 50 nM HHT and 20  $\mu$ M Z-VAD-FMK or Z-IETD-FMK for 1 h followed by treatment with 200 ng/mL of human recombinant TRAIL. **(A)** Induction of apoptosis was determined by staining with an antibody that was specific to cleaved PARP. The percentage of cells that stained positive for cleaved PARP (% apoptotic cells) after 6 h of treatment was determined by flow cytometry. Each bar represents the mean of  $n=3$  experiments; error bars show  $\pm$  SEM,  $***p < 0.001$ . **(B)** Cell death was determined by DNA content analysis by flow cytometry. The subG1 population is gated. Representative histograms of three independent experiments are shown. **(C)** Western blot analysis of activation of the extrinsic apoptotic pathway after 3 h of treatment. Alpha tubulin was used as a loading control.
