# Supplementary material
Source: PubMed Central journal article supplement (PMC3822377)
Supplement: Supp_Figure5.pdf [file Supp_Figure5.pdf]

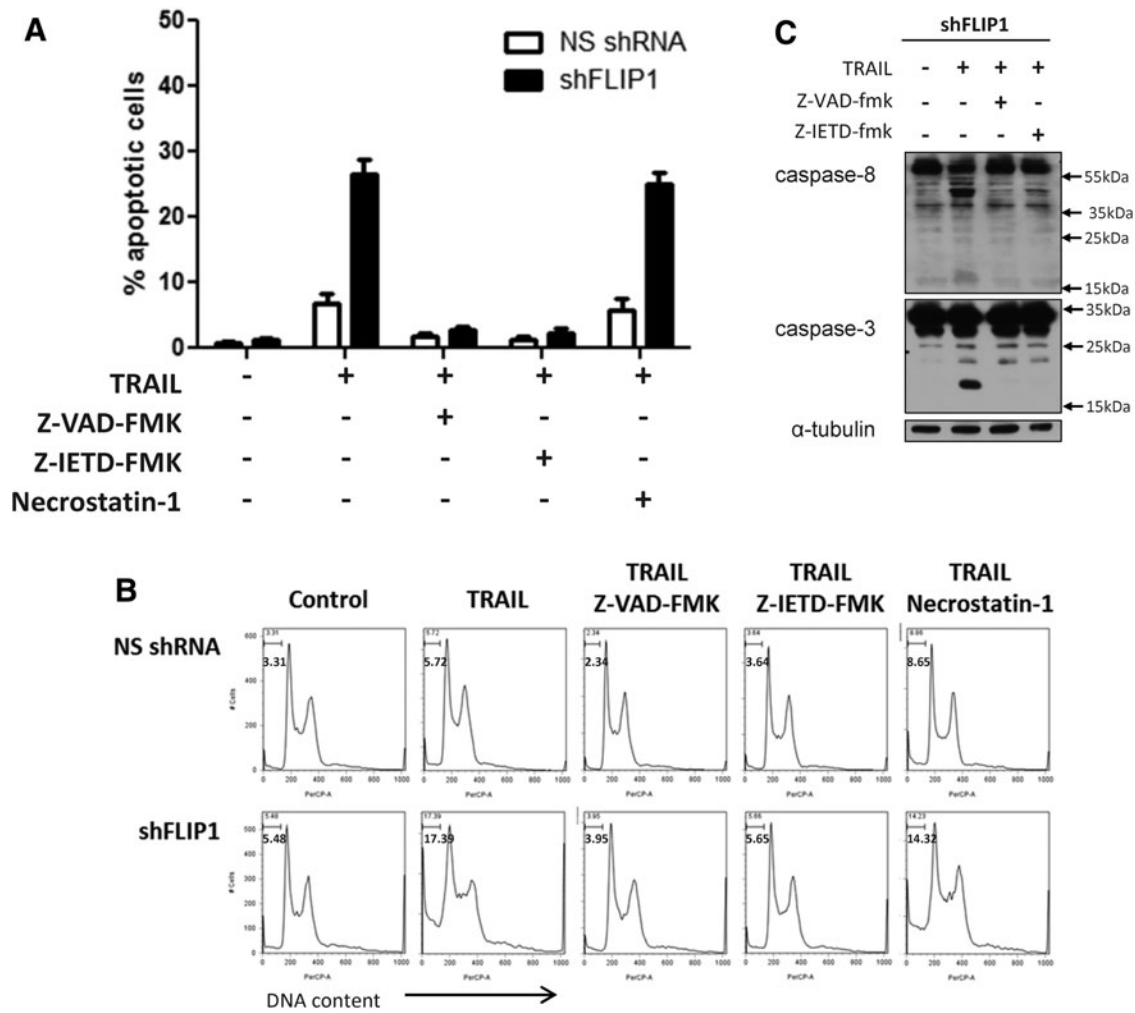

**SUPPLEMENTARY FIG. S5.** Caspase inhibitors reduce TRAIL-induced apoptosis in cells with suppressed expression of cFLIP. The hESCs with down-regulated expression of cFLIP or control cells were established by transduction of the hESC line CCTL14 with a lentivirus expressing short hairpin RNAs targeting cFLIP mRNA (shFLIP1) or nontargeting NS shRNA. **(A)** NS shRNA and shFLIP1 cells were left untreated (control), treated with 200 ng/mL TRAIL, or co-treated with 200 ng/mL TRAIL and 20  $\mu$ M Z-VAD-FMK, Z-IETD-FMK, or necrostatin-1. Induction of apoptosis was determined by staining with an antibody that was specific to cleaved PARP and flow cytometry. Each bar represents the mean of  $n=3$  experiments; error bars show  $\pm$ SEM. **(B)** Cell death was determined by DNA content analysis by flow cytometry 6 h after treatment. The subG1 population is gated. Representative histograms of three independent experiments are shown. **(C)** Western blot analysis of the activation of the extrinsic apoptotic pathway in cells with down-regulated expression of cFLIP after 3 h of treatment. Alpha tubulin was used as a loading control.
